## **CALCIUM TRANSPORT IN GILL PLASMA MEMBRANES OF THE CRAB *CARCINUS MAENAS*: EVIDENCE FOR CARRIERS DRIVEN BY ATP AND A Na<sup>+</sup> GRADIENT**

GERT FLIK, PIETER M. VERBOST, WIM AT SMA

*Department of Animal Physiology, Faculty of Science, University of Nijmegen,  
Toernooiveld, 6525 ED Nijmegen, The Netherlands*

AND CEDOMIL LUCU

*'Ruder Boskovic' Institute, Center for Marine Research, 52210 Rovinj, Croatia*

*Accepted 20 June 1994*

### **Summary**

A procedure was developed for the preparation of inside-out vesicles from plasma membranes isolated from the branchial epithelium of the green shore crab *Carcinus maenas* (L.). Procedures normally applied to fish branchial epithelium required the introduction of an additional hypotonic shock to obtain a preparation containing 22 % inside-out vesicles, 33 % right-side-out vesicles and 45 % leaky membrane fragments. In such membrane preparations, the first direct evidence for uphill (against a [Ca<sup>2+</sup>] gradient) ATP-dependent and Na<sup>+</sup>-gradient-dependent Ca<sup>2+</sup> transport in crustacean gills was found. The affinity for Ca<sup>2+</sup> of the ATP-driven Ca<sup>2+</sup> transporter was 149 nmol l<sup>-1</sup> and that of the Na<sup>+</sup>/Ca<sup>2+</sup> exchanger was 1.78 μmol l<sup>-1</sup>; the V<sub>max</sub> values were 1.73 and 9.88 nmol min<sup>-1</sup> mg<sup>-1</sup> protein respectively. The relative importance of these carriers for Ca<sup>2+</sup> transport in the branchial epithelium of the crab is evaluated on the basis of their calcium kinetics.

### **Introduction**

The branchial epithelium of crustacean gills forms a delicate barrier between the external and internal media and serves an important role in respiration, acid–base balance, volume regulation and the transport of ions. Intensive research on Na<sup>+</sup> and Cl<sup>-</sup> handling by crustaceans living in marine and brackish waters has been carried out (Mantel and Farmer, 1983; Lucu, 1990, 1993; Towle, 1993), but only a few reports on branchial Ca<sup>2+</sup> handling are available at the moment (Greenaway, 1985; Cameron, 1989, 1990).

Studies on Ca<sup>2+</sup> metabolism in crustaceans have focused on the processes of calcification in the carapace. Roer (1980) has shown that, during the late premoult stage, Ca<sup>2+</sup> is resorbed from the carapace and subsequently transported across the hypodermis into the haemolymph. In aquatic crustaceans, most of the body Ca<sup>2+</sup> is lost during this

Key words: crab, gills, calcium transport, plasma membrane, vesicles, Na<sup>+</sup>/K<sup>+</sup>-ATPase, Na<sup>+</sup>/Ca<sup>2+</sup> exchange, *Carcinus maenas*.

period *via* the gills and with the exuvia (Greenaway, 1974a, 1985), softening the exoskeleton and allowing ecdysis. In the postmoult stage, calcium remaining in the haemolymph is transported to the carapace across the hypodermis (Greenaway, 1974b, 1985). Moreover, crustaceans mobilize large amounts of calcium from the surrounding water during the postmoult period to calcify the enlarged cuticle and the carapace. This implies that the gills must be involved in inwardly directed (from water to haemolymph) and regulated  $\text{Ca}^{2+}$  transport.

In the hypodermal epithelium of postmoult blue crab *Callinectes sapidus*,  $\text{Ca}^{2+}$ -ATPase activity increases compared with that measured in the intermoult stages (Cameron, 1989). However, the kinetic properties of this ATPase (an affinity for  $\text{Ca}^{2+}$  too low to play a role in intracellular calcium homeostasis) suggest that this activity is that of a non-specific  $\text{Ca}^{2+}$ - and ATP-consuming phosphatase (with unknown function), similar to the one described in fish gills, and not that of a high-affinity  $\text{Ca}^{2+}$ -ATPase involved in the extrusion of  $\text{Ca}^{2+}$  from the cell (Flik *et al.* 1984). The inward transport of calcium across the hypodermis of *Carcinus maenas* was postulated to occur through the action of an ATPase or of a  $\text{Na}^+/\text{Ca}^{2+}$  exchanger for extrusion of  $\text{Ca}^{2+}$  from the cells (Roer, 1980). However, no direct biochemical evidence for  $\text{Ca}^{2+}$  transport across the plasma membrane, and thus for the existence of such carriers, has yet been reported. Morris and Greenaway (1992) have found evidence for high-affinity  $\text{Ca}^{2+}$ -ATPase activity ( $K_{0.5}$  for  $\text{Ca}^{2+}$  in the nanomolar range) in the gills of the crab *Leptograpsus variegatus*. The kinetics of this enzymatic activity indeed favour a role of branchial epithelial cells in  $\text{Ca}^{2+}$  transport and homeostasis. However, Morris and Greenaway (1992) measured ATPase activity and this was assumed to reflect the transport activity. As shown in a study on 'pumping and non-pumping' ATPase activity in rat liver plasma membranes (Lin and Russel, 1988), one has to be cautious when making this assumption.

The hypodermis plays a pivotal role in the recycling of  $\text{Ca}^{2+}$  from the carapace during moulting and in calcification of the carapace; however,  $\text{Ca}^{2+}$  uptake from the environment is required to *augment* the body calcium pool after moulting and to recalcify the carapace rapidly (Greenaway, 1985; Neufeld and Cameron, 1993). Uptake of calcium from the environment could take place *via* the gills and the gut.  $\text{Ca}^{2+}$  uptake may reach a maximum rate in postmoult blue crabs (*Callinectes sapidus*) that have not yet resumed eating (Neufeld and Cameron, 1993) and, in this case, must occur *via* the gills. It seems reasonable then, to postulate an active  $\text{Ca}^{2+}$  transport mechanism for uptake *via* the gills. In this study, we concentrated on  $\text{Ca}^{2+}$  transport by the gills at the membrane level.

Procedures developed for the isolation of membranes from fish branchial epithelium (Flik *et al.* 1984, 1985a,b; Perry and Flik, 1988) were applied to crab branchial epithelium and yielded a plasma membrane vesicle preparation with a high proportion of resealed vesicles (more than 70%), but too low a number of inside-out membrane vesicles (IOVs) to demonstrate  $\text{Ca}^{2+}$  transport. An additional hypotonic shock, as originally suggested for the preparation of red blood cell membrane IOVs (Sarkadi *et al.* 1980), yielded 22% IOVs in the crab membrane preparation and allowed us to demonstrate ATP- and  $\text{Na}^+$ -gradient-driven  $\text{Ca}^{2+}$  transport.

We used intermoult stages of the euryhaline crab *Carcinus maenas* adapted for at least

2 weeks to 50 % sea water as Ca<sup>2+</sup> transport was predicted to be enhanced under these conditions (Neufeld *et al.* 1980).

## Materials and methods

### *Animals*

Green shore crabs, *Carcinus maenas*, were collected early in January by netting in the Waddensea, The Netherlands. The animals were transferred to the laboratory and kept in running sea water at 6 °C, the temperature of the Waddensea at the time the crabs were caught. The mass of the animals ranged from 10 to 30 g. Only male specimens in intermoult stage were used. At least 14 days before experimentation, the sea water was diluted to 50 % with demineralized water over a 24 h period. The crabs were fed cod strips daily and kept at a photoperiod of 16 h:8 h (L:D). Less than 5 % mortality was observed. Haemolymph was collected by puncture of an infrabranchial sinus near the base of a walking leg. The haemolymph was centrifuged for 3 min at 9000 g and the plasma stored at -20 °C until assay. After the carapace had been opened, posterior gills 6-9 were dissected out and quickly cooled on ice. The posterior gills contain an abundance of mitochondria-rich cells (Compère *et al.* 1989), which are the equivalent of the ionocytes found in other ion-transporting epithelia. The Na<sup>+</sup> contents of water and plasma were determined by flame photometry on 200-fold diluted samples using a Technikon model IV Autoanalyzer; LiNO<sub>3</sub> (5 mmol l<sup>-1</sup>) was used as an internal standard. Water and plasma total calcium were determined with an endpoint colorimetric assay kit (Sigma, no. 587). A combined calcium-phosphorus standard set (Sigma, no. 360-11) was used as reference.

### *Isolation procedure*

Gills from 2-4 animals were pooled to obtain 2-5 g of tissue. Tissue was disrupted by 20 strokes in a Douncer homogenization device equipped with a loosely fitting pestle in 10 ml g<sup>-1</sup> of a hypotonic buffer containing 12.5 mmol l<sup>-1</sup> NaCl, 1 mmol l<sup>-1</sup> Hepes/Tris (pH 8), 1 mmol l<sup>-1</sup> dithiothreitol, 0.5 mmol l<sup>-1</sup> EDTA and the serine protease inhibitor aprotinin (280 i.u l<sup>-1</sup>). The resulting suspension was filtered over cheesecloth to remove particulate material and branchial septa. This filtrate was designated the original homogenate (H<sub>0</sub>); 0.5 ml was set aside on ice for further assay and the remainder was centrifuged at 550 g for 15 min to remove nuclei and cellular debris. The resulting supernatant was centrifuged for 30 min at 50 000 g to collect the membranes. The pelletized material consisted of a brownish part fixed against the wall of the centrifugation tube (this part contains most of the mitochondrial fragments, indicated by around 90 % of the total branchial succinic acid dehydrogenase activity) and, above this, a whitish fluffy layer. The fluffy layer was carefully collected by mild swirling in a quantity of buffer (10 ml g<sup>-1</sup> starting material) containing 0.5 mmol l<sup>-1</sup> Tris/HCl (pH 8.5), 20 μmol l<sup>-1</sup> EDTA and 50 μmol l<sup>-1</sup> β-mercaptoethanol (Sarkadi *et al.* 1980). The membranes were resuspended in the buffer by 20 strokes in the Douncer and left first for 30 min on ice and subsequently for 15 min at 37 °C. Every 5 min during this 45 min incubation period the suspension was vigorously agitated for 15 s. The suspension was

then cooled again to 0 °C and centrifuged for 10 min at 10 000 g (to remove remaining mitochondrial fragments); the resulting supernatant was centrifuged for 30 min at 50 000 g to sediment the plasma membranes (see below). The pellet (P<sub>3</sub>) was resuspended in 400 µl of buffer containing 150 mmol l<sup>-1</sup> KCl or NaCl, 0.8 mmol l<sup>-1</sup> MgCl<sub>2</sub> and 20 mmol l<sup>-1</sup> Hepes/Tris (pH 7.4). Vesiculation was secured by 15 passes through a 23 gauge needle fitted to a tuberculin syringe. Membranes in potassium buffer were used for ATP-dependent Ca<sup>2+</sup> transport assays, membranes in sodium buffer for Na<sup>+</sup>-gradient-driven Ca<sup>2+</sup> transport and marker enzyme determinations. Transport assays were carried out on the day of isolation. The membranes were kept on ice. When 0.5 ml of P<sub>3</sub> suspension was prepared, the protein content ranged from 1 to 1.5 mg ml<sup>-1</sup> bovine serum albumin (BSA) equivalents (see below).

#### *Assays and membrane characteristics*

The protein content of the membrane preparation was determined according to Bradford's procedure (BioRad, catalogue no. 500-0002), using bovine serum albumin (BSA) as a reference. Two marker enzymes were used to characterize the membrane preparation: succinic acid dehydrogenase (SDH) for mitochondrial membrane fragments and ouabain-sensitive, sodium- and potassium-dependent ATPase (Na<sup>+</sup>/K<sup>+</sup>-ATPase) for basolateral plasma membranes (Flik *et al.* 1990). K<sup>+</sup>-dependent, ouabain-sensitive *p*-nitrophenylphosphatase (K<sup>+</sup>-pNPPase) activity (which reflects the dephosphorylation step of the Na<sup>+</sup>/K<sup>+</sup>-ATPase) was determined as the difference between the amounts of inorganic phosphate (P<sub>i</sub>) released from pNPP in a medium containing 20 mmol l<sup>-1</sup> Tris/Hepes (pH 7.4), 120 mmol l<sup>-1</sup> NaCl, 10 mmol l<sup>-1</sup> KCl and 3 mmol l<sup>-1</sup> Na<sub>2</sub>pNPP and the amount of P<sub>i</sub> released in the same medium but without KCl and supplemented with 1 mmol l<sup>-1</sup> ouabain. The incubation was carried out at 37 °C for 30 min.

Three detergents were tested for their suitability to unmask enzymatic activities that become latent as a result of membrane resealing. As shown in Fig. 1, digitonin and 3-[(3-cholamidopropyl)dimethylammonio]-1-propane-sulphonate (Chaps) had no effect, or a slightly inhibitory effect, on Na<sup>+</sup>/K<sup>+</sup>-ATPase respectively, at concentrations where a clear stimulation was obtained with saponin. The optimum saponin concentration was 0.2 mg per milligram membrane BSA equivalents, and saponin at this concentration was used in all instances when determination of optimal activity was required.

Data on recovery (ratio of total activities in H<sub>0</sub> and P<sub>3</sub>) and enrichment (ratio of specific activities in H<sub>0</sub> and P<sub>3</sub>) of marker enzymes for the isolation procedure are given in Table 1. The protein recovery was 2.8±0.5 % BSA equivalents, the Na<sup>+</sup>/K<sup>+</sup>-ATPase activity recovery was 12.9±3.6 % and the K<sup>+</sup>-pNPPase recovery 17.7±2.9 %. No purification occurred and low recovery was observed for SDH activity. We conclude from these results that the P<sub>3</sub> fraction obtained by this procedure reflects a plasma membrane preparation.

Membrane orientation was analyzed on the basis of K<sup>+</sup>-pNPPase and Na<sup>+</sup>/K<sup>+</sup>-ATPase activity (Flik *et al.* 1990). Briefly, saponin was used to unmask enzymatic activities that are latent as a result of membrane resealing. The K<sup>+</sup>-pNPPase activity was used to identify inside-out membrane vesicles (IOVs). The K<sup>+</sup>-pNPPase assay replaced the assay of the exoenzyme acetyl cholinesterase that we have successfully applied to fish (Flik

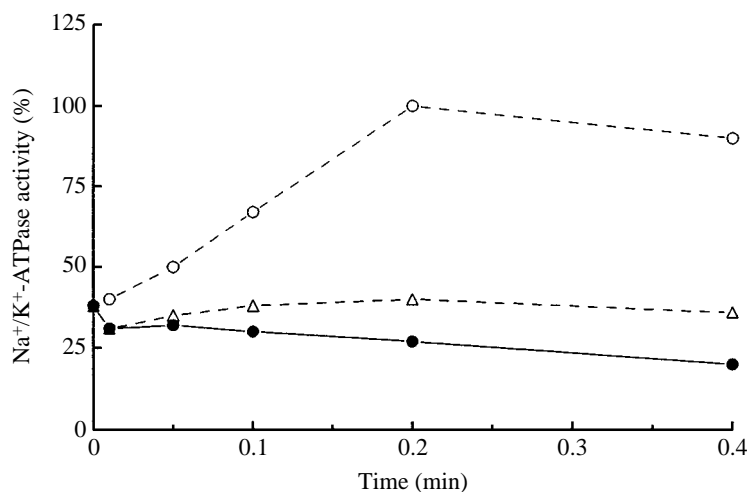

Fig. 1. Effects of detergents on Na<sup>+</sup>/K<sup>+</sup>-ATPase activity in a crab gill plasma membrane preparation. The highest Na<sup>+</sup>/K<sup>+</sup>-ATPase activity (designated 100 %) was observed at 0.2 mg saponin per milligram membrane protein (open circles). Chaps (filled circles) and digitonin (open triangles) had no stimulatory effects. Values are means for three different membrane preparations.

Table 1. Purification and recovery of marker enzymes in membrane vesicles prepared from *Carcinus maenas* branchial epithelium

|                                                                                                                             | H <sub>0</sub> | P <sub>3</sub> | Enrichment factor | Percentage recovery |
|-----------------------------------------------------------------------------------------------------------------------------|----------------|----------------|-------------------|---------------------|
| Total protein (mg BSA equivalents)                                                                                          | 52.4±3.1       | 1.47±0.29      | —                 | 2.8±0.5             |
| Specific activity of Na <sup>+</sup> /K <sup>+</sup> -ATPase (μmol P <sub>i</sub> h <sup>-1</sup> mg <sup>-1</sup> protein) | 17.2±8.8       | 79.3±11.7      | 5.8±2.2           | 12.9±3.6            |
| Specific activity of K <sup>+</sup> -pNPPase (μmol P <sub>i</sub> h <sup>-1</sup> mg <sup>-1</sup> protein)                 | 2.54±0.27      | 16.0±6.8       | 6.3±1.3           | 17.7±2.9            |
| Specific activity of SDH (ΔA <sub>490</sub> h <sup>-1</sup> mg <sup>-1</sup> protein)                                       | 110±28         | 111±28         | 0.9±0.3           | 1.1±0.2             |

The enrichment factor is the ratio of the specific activity in the plasma membrane fraction P<sub>3</sub> to that in the original homogenate H<sub>0</sub>.

The percentage recovery is the ratio of the total activity (specific activity × total protein in the relevant fraction) in P<sub>3</sub> to that in H<sub>0</sub> multiplied by 100.

K<sup>+</sup>-pNPPase, K<sup>+</sup>-dependent, ouabain-sensitive pNPPase activity; SDH, succinate dehydrogenase.

Mean values ± s.d. are given for five preparations.

*et al.* 1990) and human red cell (Verboost *et al.* 1989) preparations; esterase activity proved to be too low to measure in our crab gill plasma membrane preparation. The trypsin-sensitivity of the cytosolic part of the Na<sup>+</sup>/K<sup>+</sup>-ATPase was the basis for the identification

of the right-side-out membrane vesicles (ROVs): after trypsin treatment, only ROVs are left with an intact Na<sup>+</sup>/K<sup>+</sup>-ATPase that may subsequently be unmasked by saponin. Inactivation of Na<sup>+</sup>/K<sup>+</sup>-ATPase activity in IOVs and leaky membrane fragments was optimal when they were treated with 4500 BAEE trypsin (Sigma, T0134) units per milligram membrane protein for 30 min at 25 °C. Trypsin activity was stopped by addition of 25 mg ml<sup>-1</sup> soybean trypsin inhibitor (Sigma, T9253). In controls, the inhibitor was added before the addition of trypsin.

In all preparations saponin enhanced the K<sup>+</sup>-pNPPase activity. Expressed as a percentage, the enhancement (mean values for specific activity  $V_{\text{spec}}$  were 13.6±5.9 and 16.0±6.8 μmol P<sub>i</sub> h<sup>-1</sup> mg<sup>-1</sup> protein, in the absence and in the presence of saponin, respectively) was 18.6±2.6% (N=5), indicating 19% of IOVs in the preparation. The trypsin-insensitive Na<sup>+</sup>/K<sup>+</sup>-ATPase activity ( $V_{\text{spec}}$  22.7±4.3 μmol P<sub>i</sub> h<sup>-1</sup> mg<sup>-1</sup> protein) was 33±4% (N=5) of the total activity ( $V_{\text{spec}}$  69.6±12.9 μmol P<sub>i</sub> h<sup>-1</sup> mg<sup>-1</sup> protein), indicating 33% of ROVs in the preparation. In *untreated* membranes, the percentage resealing in P<sub>3</sub>, indicated by the increase in Na<sup>+</sup>/K<sup>+</sup>-ATPase (from 32.2±6.1 to 79.3±11.7 μmol P<sub>i</sub> h<sup>-1</sup> mg<sup>-1</sup> protein) upon saponin treatment was 59±12%. This value did not differ ( $P>0.15$ ) from the value calculated for *control-treated* membranes. In the latter, the percentage resealing indicated by the increase in Na<sup>+</sup>/K<sup>+</sup>-ATPase (from 31.8±5.5 to 69.6±12.9 μmol P<sub>i</sub> h<sup>-1</sup> mg<sup>-1</sup> protein) upon saponin treatment was 55±10%; from this value we calculated that there were 45±10% leaky membrane fragments in the preparation and 22±8% IOVs (percentage of resealed vesicles minus percentage of ROVs). The value for IOVs derived from Na<sup>+</sup>/K<sup>+</sup>-ATPase activity is in good agreement with the 18.6±2.6% IOVs determined directly by the K<sup>+</sup>-pNPPase activity assay (Table 2). The average configuration of the membrane preparation was therefore 22% IOVs, 33% ROVs and 45% leaky membrane fragments.

Table 2. *Resealing and orientation of plasma membranes of Carcinus maenas branchial epithelium*

|                                         | - saponin | + saponin | %R | %ROVs | %IOVs           |
|-----------------------------------------|-----------|-----------|----|-------|-----------------|
| Na <sup>+</sup> /K <sup>+</sup> -ATPase |           |           |    |       |                 |
| Untreated membranes                     | 32.2±6.1  | 79.3±11.7 | 59 | —     | —               |
| Control-treated membranes               | 31.8±5.5  | 69.6±12.9 | 55 | —     | —               |
| Trypsin-treated membranes               | —         | 22.7±4.3  | —  | 33    | 22 <sup>a</sup> |
| K <sup>+</sup> -pNPPase                 |           |           |    |       |                 |
| Untreated membranes                     | 13.6±5.9  | 16.0±6.8  | —  | —     | 19              |

Saponin was used at the optimum concentration of 0.2 mg mg<sup>-1</sup> BSA equivalents. The specific activity is expressed in μmol P<sub>i</sub> h<sup>-1</sup> mg<sup>-1</sup> protein. The percentage of resealing (%R) was calculated as the fractional increase in activity upon detergent treatment of the plasma membrane fraction.

<sup>a</sup>The percentage of inside-out vesicles (%IOVs) was calculated as the difference between the percentage of resealed membranes and the percentage of right-side-out (%ROVs). For further details on the procedure, see Materials and methods section.

K<sup>+</sup>-pNPPase, K<sup>+</sup>-dependent, ouabain-sensitive pNPPase activity.

Values are means ± S.D. for five preparations.

Applying the basolateral plasma membrane isolation method for fish gills to crab gills, we found a consistent, high degree of membrane resealing in the plasma membrane fraction, 73.5±4.2%. However, the percentage of ROVs (71.1±4.3%) did not differ significantly ( $P>0.15$ ) from the percentage of resealed membranes. The calculated percentage of IOVs in these preparations was 3.8±2.2% ( $N=5$ ). In accordance with this low percentage of IOVs, we failed to show ATP-driven Ca<sup>2+</sup> transport in these preparations (data not shown).

Ca<sup>2+</sup> transport was determined as described in detail by Flik *et al.* (1990). In brief, a rapid filtration procedure was used to determine uptake of <sup>45</sup>Ca<sup>2+</sup> into vesicles. The composition of the assay medium was (final concentrations, in mmol l<sup>-1</sup>): Hepes/Tris, 20 at pH 7.4; NaCl, 150; Tris-ATP, 0 or 3; EGTA, 0.5; *N*-(2-hydroxyethyl)-ethylenediamine-*N,N',N'*-triacetic acid (HEEDTA), 0.5; nitrilo-triacetic acid (NTA), 0.5; free Mg<sup>2+</sup>, 0.8; free Ca<sup>2+</sup>, 5×10<sup>-5</sup> to 2.5×10<sup>-3</sup>; NaN<sub>3</sub>, 1.0; and oligomycin B (5 μg ml<sup>-1</sup>); free Mg<sup>2+</sup> and Ca<sup>2+</sup> concentrations were varied by the addition of MgCl<sub>2</sub> and CaCl<sub>2</sub> and the actual free ion concentrations were calculated using the program *Chelator* (Schoenmakers *et al.* 1992b). The first and second protonations of the ligands in the calcium buffer (ATP, EGTA, HEEDTA and NTA) were taken into account and the stability constants were adjusted in accordance with the pH, temperature and ionic strength of the medium. The <sup>45</sup>Ca radioactive concentration was 1.0–1.6 MBq ml<sup>-1</sup>. Incubation was carried out at the optimum *in vitro* temperature of 37 °C. ATP-driven Ca<sup>2+</sup> transport was defined as the difference in Ca<sup>2+</sup> uptake in the presence and in the absence of ATP. The incubation was terminated by quenching the reaction with 1 ml of ice-cold isotonic stop buffer (150 mmol l<sup>-1</sup> KCl, 20 mmol l<sup>-1</sup> Hepes/Tris, at pH 7.4, and 1.0 mmol l<sup>-1</sup> LaCl<sub>3</sub>). The filters (Schleicher & Schüll, ME 25) with retained <sup>45</sup>Ca<sup>2+</sup> containing vesicles were washed three times with 2 ml of stop buffer. After 30 min in scintillation fluid (Aqualuma, Lumac), the filters had dissolved and the radioactivity collected on them was subsequently determined by liquid scintillation counting.

Na<sup>+</sup>-dependent Ca<sup>2+</sup> transport across plasma membranes was assayed as the difference in <sup>45</sup>Ca<sup>2+</sup> accumulation upon transfer of membrane vesicles equilibrated in 150 mmol l<sup>-1</sup> NaCl to a medium containing either 150 mmol l<sup>-1</sup> NaCl (blank) or 150 mmol l<sup>-1</sup> KCl. In preparing the media, a 25-fold dilution of the vesicle suspension was taken into account to yield the following composition (final concentrations in mmol l<sup>-1</sup>): NaCl or KCl, 150; Hepes/Tris, 20 at pH 7.4; EGTA, 0.5; HEEDTA, 0.5; NTA, 0.5; free Mg<sup>2+</sup>, 0.8; and free Ca<sup>2+</sup>, 5×10<sup>-4</sup> to 2.5×10<sup>-2</sup>. Free Ca<sup>2+</sup> and Mg<sup>2+</sup> concentrations were calculated as described above. The <sup>45</sup>Ca radioactive concentration was 0.5–0.8 MBq ml<sup>-1</sup>. A 5 μl vesicle suspension was mixed with 120 μl of medium, both prewarmed to 37 °C. After 5 s of incubation, the reaction was stopped by addition of 1 ml of isotonic ice-cold stop buffer (150 mmol l<sup>-1</sup> NaCl, 20 mmol l<sup>-1</sup> Hepes/Tris at pH 7.4, 1.0 mmol l<sup>-1</sup> EDTA). Membrane vesicles with retained <sup>45</sup>Ca<sup>2+</sup> were collected by filtration as described above.

#### Calculations and statistics

Kinetic data were analyzed using Enzfitter, a non-linear regression data analysis program (Leatherbarrow, 1987). Significance of differences between mean values was

assessed by the Mann–Whitney *U*-test. Data are presented as mean values  $\pm 1$  standard deviation (s.d.). Significance was accepted when  $P < 0.05$ .

### Results

Crabs kept for 2–4 weeks in 50% sea water, containing  $5.3 \text{ mmol l}^{-1} \text{ Ca}^{2+}$ , had mean haemolymph  $\text{Ca}^{2+}$  levels of  $9.77 \pm 1.13 \text{ mmol l}^{-1}$  ( $N=21$ ). Apparently, these animals hyperregulated their internal  $\text{Ca}^{2+}$  levels. The low variation in plasma  $\text{Ca}^{2+}$  levels was taken as circumstantial evidence for the intermoult stage.

Membrane vesicles, characterized as the basolateral plasma membrane fraction, were isolated from posterior gills 6–9 of these intermoult crabs (see Materials and methods). As shown in Fig. 2, uphill (against a  $[\text{Ca}^{2+}]$  gradient)  $^{45}\text{Ca}^{2+}$  accumulation in the vesicles occurred in the presence of ATP and was abolished by the ionophore A23187. Addition of the ionophore resulted in a loss of  $^{45}\text{Ca}^{2+}$  from the loading vesicles. The apparently linear increase in  $^{45}\text{Ca}^{2+}$  uptake observed during the first minute indicated that the uptake at 1 min reflected the initial velocity of the transporter.

Kinetic analysis of the ATP-driven  $\text{Ca}^{2+}$  transport (1 min determinations) obeyed Michaelis–Menten kinetics for a single enzyme (Fig. 3). The  $K_m$  for  $\text{Ca}^{2+}$  was  $149 \text{ nmol l}^{-1}$  and the maximum velocity was  $1.73 \text{ nmol min}^{-1} \text{ mg}^{-1}$  protein.

As shown in Fig. 4, significantly more  $^{45}\text{Ca}^{2+}$  was accumulated when  $\text{Na}^+$ -loaded vesicles were transferred to a medium containing an equimolar concentration of  $\text{K}^+$  instead of  $\text{Na}^+$ , suggesting the presence of a  $\text{Na}^+/\text{Ca}^{2+}$  exchanger in these membranes.

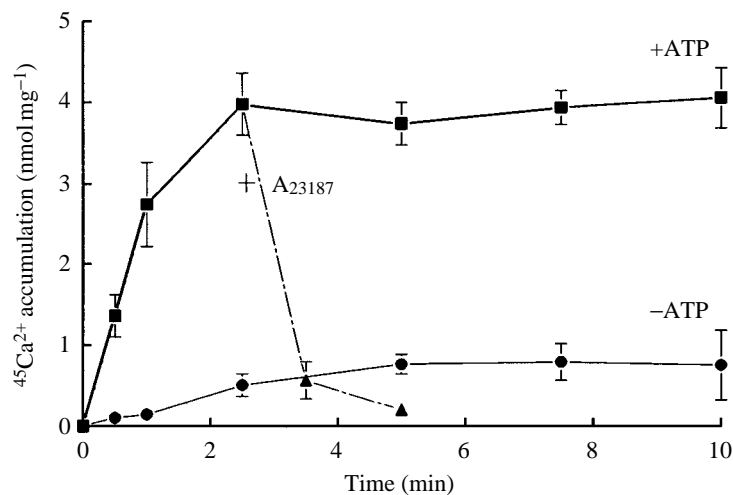

Fig. 2. ATP-driven  $\text{Ca}^{2+}$  transport in crab gill plasma membranes. Accumulation of  $^{45}\text{Ca}^{2+}$  was stimulated by ATP (filled squares) and accumulated  $^{45}\text{Ca}^{2+}$  was released by addition of the ionophore A23187 (filled triangles). Little  $^{45}\text{Ca}^{2+}$  was associated with the membrane vesicle preparation in the absence of ATP (filled circles). The free  $\text{Ca}^{2+}$  concentration was  $1 \mu\text{mol l}^{-1}$ . Note the linear increase in the rate of  $^{45}\text{Ca}^{2+}$  uptake during the first minute of uptake. Values are means  $\pm$  s.d. for five preparations.



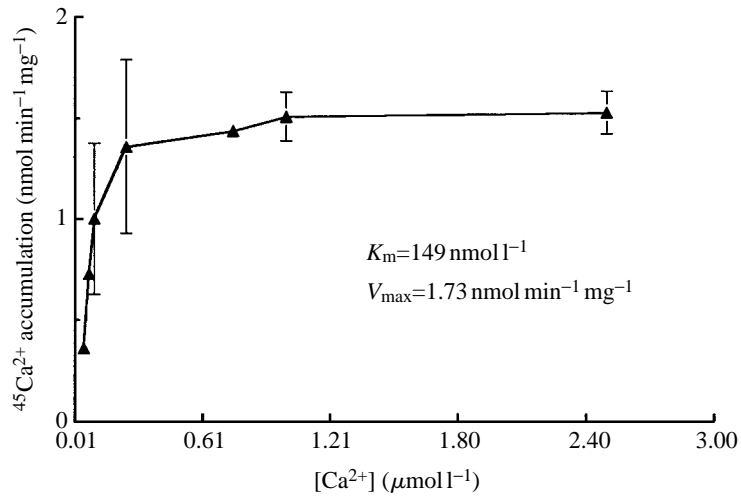

Fig. 3. Kinetics of ATP-driven (the difference between 1 min determinations of  $^{45}Ca^{2+}$  accumulation in the presence and absence of ATP)  $Ca^{2+}$  transport in crab gill plasma membranes. Half-maximal activation by  $Ca^{2+}$  occurred at  $149\text{ nmol l}^{-1}$  and a maximum velocity of  $1.73\text{ nmol min}^{-1}\text{ mg}^{-1}$  protein was calculated. Values are means  $\pm$  S.D. for five preparations.

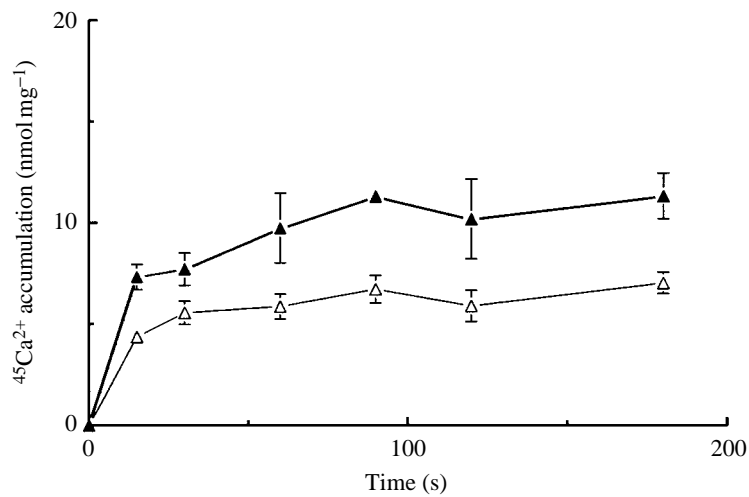

Fig. 4.  $Na^{+}$ -driven  $Ca^{2+}$  transport in plasma membranes of crab gills.  $^{45}Ca^{2+}$  accumulation in vesicles loaded with  $150\text{ mmol l}^{-1}\text{ Na}^{+}$  transferred to a medium containing  $150\text{ mmol l}^{-1}\text{ K}^{+}$  (filled triangles) surpassed that in the same vesicles transferred to a medium containing  $150\text{ mmol l}^{-1}\text{ Na}^{+}$  (open triangles). The free  $Ca^{2+}$  concentration was  $1\text{ }\mu\text{mol l}^{-1}$ . Values are means  $\pm$  S.D. for five preparations.

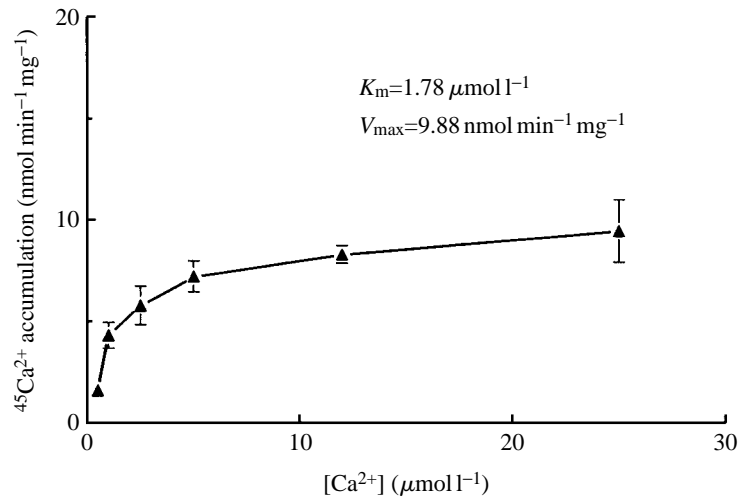

Fig. 5. Kinetics of  $\text{Na}^+$  gradient-driven  $\text{Ca}^{2+}$  transport (the difference between 5 s determinations of  $\text{Ca}^{2+}$  accumulation upon transfer of vesicles loaded with  $150 \text{ mmol l}^{-1} \text{ Na}^+$  to a medium containing  $150 \text{ mmol l}^{-1} \text{ K}^+$  or  $\text{Na}^+$ ). Half-maximal activation ( $K_m$ ) occurred at  $1.78 \mu\text{mol l}^{-1} \text{ Ca}^{2+}$  and a maximum velocity of  $9.88 \text{ nmol min}^{-1} \text{ mg}^{-1}$  protein was calculated. Values are means  $\pm$  S.D. for five preparations.

Subsequently, we analyzed the  $\text{Ca}^{2+}$  kinetics of the exchanger (Fig. 5) to evaluate its activity relative to that of the ATP-driven  $\text{Ca}^{2+}$  pump. The  $\text{Na}^+/\text{Ca}^{2+}$  exchange activity obeyed Michaelis–Menten kinetics for a single enzyme;  $V_{\text{max}}$  was  $9.88 \text{ nmol min}^{-1} \text{ mg}^{-1}$  protein and  $K_m$  was  $1.78 \mu\text{mol l}^{-1}$ . The relative contributions of these two calcium carriers to  $\text{Ca}^{2+}$  extrusion in a branchial  $\text{Ca}^{2+}$ -transporting cell are presented in Fig. 6.

### Discussion

We provide here the first direct evidence for active  $\text{Ca}^{2+}$  transport in basolateral plasma membranes of the gills of a crustacean, i.e. an ATP-driven  $\text{Ca}^{2+}$  uptake and a  $\text{Na}^+$ -gradient-driven  $\text{Ca}^{2+}$  extrusion mechanism. Both activities proved to be homogeneous (indicated by kinetics for a single enzyme), and their half-maximal activation by  $\text{Ca}^{2+}$  occurred at physiological cell  $\text{Ca}^{2+}$  concentrations. Two other important conclusions can be drawn from the data presented. First, the plasma membranes from green shore crab gills have a strong tendency to reseal predominantly as ROVs, which may hamper the direct demonstration of  $\text{Ca}^{2+}$  extrusion activity, which can only be measured in IOVs (Schoenmakers and Flik, 1992). However, when the membranes were subjected to a strong hypotonic shock (Sarkadi *et al.* 1980), sufficient IOVs were formed to measure such activities. Second, the activity of the  $\text{Na}^+/\text{Ca}^{2+}$  exchanger exceeds that of the  $\text{Ca}^{2+}$ -ATPase in the branchial plasma membrane and may, therefore, be predicted to play an important role in  $\text{Ca}^{2+}$  transport in this epithelium.

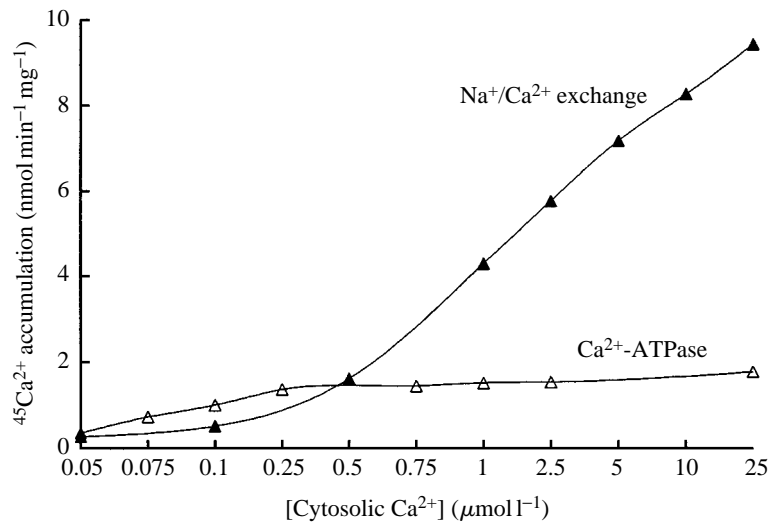

Fig. 6. The activities of the Ca<sup>2+</sup>-ATPase (open triangles) and Na<sup>+</sup>/Ca<sup>2+</sup> exchanger (filled triangles) in plasma membranes of *Carcinus maenas* gills as functions of the Ca<sup>2+</sup> concentration in the cell. The transport activities of both extrusion mechanisms were determined on samples from the same resealed vesicle preparations. Values are means for five preparations.

#### Haemolymph and water [Ca<sup>2+</sup>]

Euryhaline crabs (e.g. the green shore crab *Carcinus maenas* and the blue crab *Callinectes sapidus*) maintain high plasma osmotic values when confronted with decreasing salinities (Siebers *et al.* 1982; Mantel and Farmer, 1983; Lucu and Siebers, 1986; Shetlar and Towle, 1989). Neufeld and Cameron (1993) have given a convincing electrochemical evaluation of branchial Ca<sup>2+</sup> exchange in the blue crab and postulated that active Ca<sup>2+</sup> transport mechanisms must exist in its branchial epithelium. There is evidence that haemolymph Ca<sup>2+</sup> levels can be maintained hyperionic to the medium when crabs are acclimated to dilute sea water (*Carcinus maenas*, Greenaway, 1976; this study), indicating that net uptake of Ca<sup>2+</sup> from the water must occur. Indeed, in intermoult *Carcinus mediterraneus*, which is closely related to the green shore crab used in this study, kept under identical water conditions to those described in this paper, whole-body (branchial) Ca<sup>2+</sup> influx ( $6.57 \pm 1.95 \mu\text{mol h}^{-1} \text{g}^{-1}$ ) significantly exceeded the efflux ( $3.15 \pm 2.63 \mu\text{mol h}^{-1} \text{g}^{-1}$ ; means  $\pm$  s.d.,  $N=6$ ; C. Lucu, unpublished data). The resulting net Ca<sup>2+</sup> influx via the gills could explain the high Ca<sup>2+</sup> concentration of the haemolymph. The transcellular movement of Ca<sup>2+</sup> that must underlie this influx warranted further studies on Ca<sup>2+</sup> transport mechanisms in the gills.

#### Membrane isolation

Na<sup>+</sup>/K<sup>+</sup>-ATPase activity has been localized exclusively in the basolateral plasma membrane of blue as well as green shore crab gill cells (Towle and Kays, 1986; Morris

and Greenaway, 1992). Its enrichment in the membrane fraction used in this study, therefore, indicates that this fraction is enriched in basolateral plasma membranes. Moreover, SDH activity was not enriched in this fraction, indicating that mitochondrial membrane fragments had selectively been removed.

The values for enzyme enrichment and recovery of plasma membranes calculated on the basis of  $\text{Na}^+/\text{K}^+$ -ATPase and  $\text{K}^+$ -pNPPase were comparable, which strongly suggested that these activities indeed reflect the activity of the same enzymatic entity. This allowed a direct comparison of these activities, as used in the membrane orientation assays. The value of 22 % for IOVs, calculated indirectly on the basis of the trypsin treatment of membranes, was strongly supported by the comparable value of 19 % of IOVs determined directly on the basis of the  $\text{K}^+$ -pNPPase activity (Table 2). The configuration of the plasma membrane fragments in the preparation was therefore 22 % IOVs, 33 % ROVs and 45 % leaky fragments. These values compare very well with those obtained for plasma membrane vesicles prepared from fish tissues (Flik *et al.* 1985a, 1990), which have been shown to be suitable for the demonstration of membrane  $\text{Ca}^{2+}$  transport. It should be noted that others (Towle and Hølleland, 1987; Shetlar and Towle, 1989; Hølleland and Towle, 1990) have succeeded in isolating plasma membrane preparations from blue and green shore crab gills with sufficient IOVs to demonstrate energized  $\text{Na}^+$  transport, applying procedures not very different from those normally applied to fish gill epithelium, but that yielded insufficient IOVs for measurements of  $\text{Ca}^{2+}$  transport. This suggests that species differences may exist with respect to membrane behaviour during isolation procedures and, therefore, that these procedures need careful evaluation.

#### *Membrane $\text{Ca}^{2+}$ transporters*

Our kinetic studies indicated that both the ATP-driven and the  $\text{Na}^+$ -gradient-driven  $\text{Ca}^{2+}$  transport obeyed Michaelis–Menten kinetics and thus were the expression of a single class of carriers. This was taken as further evidence that the enzymatic activities in this membrane fraction reflect those present in the basolateral plasma membrane of the ion-transporting cells. The maximum velocities of the transporters are of the same order of magnitude as those found in, for instance, fish gills and intestine (Flik *et al.* 1990; Verbost *et al.* 1994) and suggest a  $\text{Ca}^{2+}$  transport capacity sufficient to explain the  $\text{Ca}^{2+}$  influx seen in these tissues.

Clearly, the  $\text{Na}^+/\text{Ca}^{2+}$  exchange activity in the crab gills may be an important mechanism for  $\text{Ca}^{2+}$  transport. Fig. 6 shows the activities of the two plasma membrane  $\text{Ca}^{2+}$  extrusion mechanisms as a function of cytosolic  $\text{Ca}^{2+}$  levels. For the exchange activity, it was assumed that the  $\text{Na}^+$  gradient was not limiting its activity. At cytosolic  $\text{Ca}^{2+}$  concentrations up to  $500 \text{ nmol l}^{-1}$ , the rate of  $\text{Ca}^{2+}$ -ATPase-mediated transport exceeds that of exchanger-mediated transport. With cytosolic  $\text{Ca}^{2+}$  concentrations exceeding  $500 \text{ nmol l}^{-1}$ , the rate of export of  $\text{Ca}^{2+}$  from the cell depends predominantly on the activity of the exchanger. This situation is strongly reminiscent of that in the tilapia enterocyte, where  $\text{Na}^+/\text{Ca}^{2+}$  exchange determines the rate of extrusion of  $\text{Ca}^{2+}$  from the cell (Flik *et al.* 1990; Schoenmakers *et al.* 1992a, 1993). The crab gill may represent a second tissue in which  $\text{Ca}^{2+}$  transport is, to a large extent, mediated by a  $\text{Na}^+/\text{Ca}^{2+}$

exchanger. The occurrence of these two Ca<sup>2+</sup> transport mechanisms in a crustacean tissue lends support to the prediction from physiological experiments (Roer, 1980) that Ca<sup>2+</sup> transport in the green shore crab hypodermis must be mediated by ATP-dependent as well as Na<sup>+</sup>-dependent transport mechanisms. Further studies on the characterization of Ca<sup>2+</sup> transport mechanisms in crustacean tissues seem warranted. In particular, the regulation of these mechanisms in gills and hypodermis during the moulting cycle may yield interesting new insights into the functioning of Ca<sup>2+</sup> transporters. Euryhaline crabs may provide a particularly powerful model for the study of the Na<sup>+</sup>-dependence of Ca<sup>2+</sup> transport (when determined by the exchanger). The hyperregulation of plasma Na<sup>+</sup> in (these) crustaceans suggests that these animals may depend on a guaranteed inward Na<sup>+</sup> gradient for Ca<sup>2+</sup> extrusion, irrespective of the ion composition of the ambient medium.

Wies Vonck is gratefully acknowledged for organizing the mid-winter collection of crabs and their transport to the laboratory in Nijmegen and Tom Spanings for his outstanding organization of the crab husbandry. C. Lucu received a travel fund from the University of Zagreb.

### References

- CAMERON, J. N. (1989). Post-moult calcification in the blue crab *Callinectes sapidus*: timing and mechanisms. *J. exp. Biol.* **143**, 285–304.
- CAMERON, J. N. (1990). Unusual aspects of calcium metabolism in aquatic animals. *A. Rev. Physiol.* **52**, 77–95.
- COMPÈRE, P., WANSON, S., PÉQUEUX, A., GILLES, R. AND GOFFINET, G. (1989). Ultrastructural changes in the gill epithelium of the green crab *Carcinus maenas* in relation to external salinity. *Tissue & Cell* **21**, 299–318.
- FLIK, G., SCHOENMAKERS, TH. J. M., GROOT, J. A., VAN OS, C. H. AND WENDELAAR BONGA, S. E. (1990). Calcium absorption by fish intestine: the involvement of ATP- and sodium-dependent calcium extrusion mechanisms. *J. Membr. Biol.* **113**, 13–22.
- FLIK, G., VAN RIJS, J. H. AND WENDELAAR BONGA, S. E. (1985a). Evidence for high-affinity Ca<sup>2+</sup>-ATPase and ATP-driven Ca<sup>2+</sup>-transport in membrane preparations of the gill epithelium of the cichlid fish *Oreochromis mossambicus*. *J. exp. Biol.* **119**, 335–347.
- FLIK, G., WENDELAAR BONGA, S. E. AND FENWICK, J. C. (1984). Ca<sup>2+</sup>-dependent phosphatase and Ca<sup>2+</sup>-dependent ATPase activities in plasma membranes of eel gill epithelium. II. Evidence for transport high-affinity Ca<sup>2+</sup>-ATPase. *Comp. Biochem. Physiol.* **79B**, 9–16.
- FLIK, G., WENDELAAR BONGA, S. E. AND FENWICK, J. C. (1985b). Active Ca<sup>2+</sup>-transport in plasma membranes of branchial epithelium of the North-American eel *Anguilla rostrata* LeSueur. *Biol. Cell* **55**, 265–272.
- GREENAWAY, P. (1974a). Calcium balance at the premoult stage of the freshwater crayfish *Austropotamobius pallipes* (Lereboullet). *J. exp. Biol.* **61**, 27–34.
- GREENAWAY, P. (1974b). Calcium balance at the postmoult stage of the freshwater crayfish *Austropotamobius pallipes* (Lereboullet). *J. exp. Biol.* **61**, 35–45.
- GREENAWAY, P. (1976). The regulation of haemolymph calcium concentrations of the crab *Carcinus maenas* (L.). *J. exp. Biol.* **64**, 149–157.
- GREENAWAY, P. (1985). Calcium balance and moulting in the Crustacea. *Biol. Rev.* **60**, 425–454.
- HØLLELAND, T. AND TOWLE, D. W. (1990). Vanadate but not ouabain inhibits Na<sup>+</sup>/K<sup>+</sup>-ATPase and sodium transport in tight inside-out native membrane vesicles from crab gill (*Carcinus maenas*). *Comp. Biochem. Physiol.* **96B**, 177–181.
- LEATHERBARROW, R. J. (1987). *Enzfitter. A Non-linear Regression Data Analysis Program for the IBM PC (and True Compatibles)*. Amsterdam, the Netherlands: Elsevier, Biosoft.
- LIN, S. H. AND RUSSEL, W. E. (1988). Two Ca<sup>2+</sup>-dependent ATPases in rat liver plasma membrane. *J. Biol. Chem.* **263**, 12253–12258.

- LUCU, C. (1990). Ionic regulatory mechanisms in crustacean gill epithelia. *Comp. Biochem. Physiol.* **97A**, 297–306.
- LUCU, C. (1993). Ion transport in the gill epithelium of aquatic crustacea. *J. exp. Zool.* **265**, 378–387.
- LUCU, C. AND SIEBERS, D. (1986). Amiloride-sensitive sodium flux and potentials in perfused *Carcinus* gill preparations. *J. exp. Biol.* **122**, 25–35.
- MANTEL, L. H. AND FARMER, L. L. (1983). Osmotic and ionic regulation. In *The Biology of Crustacea*, vol. 5 (ed. L. H. Mantel), pp. 53–161. New York: Academic Press.
- MORRIS, M. A. AND GREENAWAY, P. (1992). High affinity,  $\text{Ca}^{2+}$  specific ATPase and  $\text{Na}^+/\text{K}^+$ ATPase in the gills of a supralittoral crab *Leptograpsus variegatus*. *Comp. Biochem. Physiol.* **102A**, 15–18.
- NEUFELD, D. S. AND CAMERON, J. N. (1993). Transepithelial movement of calcium in crustaceans. *J. exp. Biol.* **183**, 1–16.
- NEUFELD, G. J., HOLLIDAY, C. W. AND PRITCHARD, J. B. (1980). Salinity adaptation of gill  $\text{Na}^+/\text{K}^+$ -ATPase in the blue crab, *Callinectes sapidus*. *J. exp. Zool.* **211**, 215–224.
- PERRY, S. F. AND FLIK, G. (1988). Characterization of branchial transepithelial calcium fluxes in freshwater trout, *Salmo gairdneri*. *Am. J. Physiol.* **254**, R491–R498.
- ROER, R. D. (1980). Mechanisms of resorption and deposition of calcium in carapace of the crab *Carcinus maenas*. *J. exp. Biol.* **88**, 205–218.
- SARKADI, B., SZASZ, I. AND GARDOS, G. (1980). Characteristics and regulation of active calcium transport in inside-out red cell membrane vesicles. *Biochim. biophys. Acta* **598**, 326–338.
- SCHOENMAKERS, TH. J. M. AND FLIK, G. (1992). Sodium extruding and calcium extruding sodium/calcium exchangers display similar calcium affinities. *J. exp. Biol.* **168**, 151–159.
- SCHOENMAKERS, TH. J. M., KLAREN, P. H. M., FLIK, G., LOCK, R. A. C., PANG, P. K. T. AND WENDELAAR BONGA, S. E. (1992a). Actions of cadmium on basolateral plasma membrane proteins involved in calcium uptake by fish intestine. *J. Membr. Biol.* **127**, 161–172.
- SCHOENMAKERS, TH. J. M., VERBOST, P. M., FLIK, G. AND WENDELAAR BONGA, S. E. (1993). Transcellular intestinal calcium transport in freshwater and seawater fish and its dependence on sodium/calcium exchange. *J. exp. Biol.* **176**, 195–206.
- SCHOENMAKERS, TH. J. M., VISSER, G. J., FLIK, G. AND THEUVENET, A. P. R. (1992b). Chelator: an improved method for computing metal ion concentrations in physiological solutions. *Biotechniques* **12**, 870–879.
- SHETLAR, R. E. AND TOWLE, D. W. (1989). Electrogenic sodium–proton exchange in membrane vesicles from crab (*Carcinus maenas*) gill. *Am. J. Physiol.* **257**, R924–R931.
- SIEBERS, D., LEWECK, K., MARKUS, H. AND WINKLER, A. (1982). Sodium regulation in the shore crab *Carcinus maenas* as related to ambient salinity. *Mar. Biol.* **69**, 37–43.
- TOWLE, D. W. (1993). Ion transport systems in membrane vesicles isolated from crustacean tissues. *J. exp. Zool.* **265**, 387–397.
- TOWLE, D. W. AND HØLLELAND, T. (1987). Ammonium ion substitutes for  $\text{K}^+$  in ATP-dependent  $\text{Na}^+$  transport by basolateral membrane vesicles. *Am. J. Physiol.* **252**, R479–R489.
- TOWLE, D. W. AND KAYS, W. T. (1986). Basolateral localization of  $\text{Na}^+/\text{K}^+$ -ATPase in gill epithelium of two osmoregulating crabs, *Callinectes sapidus* and *Carcinus maenas*. *J. exp. Zool.* **239**, 311–318.
- VERBOST, P. M., FLIK, G., PANG, P. K. T., LOCK, R. A. C. AND WENDELAAR BONGA, S. E. (1989). Cadmium inhibition of the erythrocyte  $\text{Ca}^{2+}$  pump. *J. Biol. Chem.* **264**, 5613–5615.
- VERBOST, P. M., SCHOENMAKERS, TH. J. M., FLIK, G. AND WENDELAAR BONGA, S. E. (1994). Kinetics of ATP- and  $\text{Na}^+$ -gradient-driven  $\text{Ca}^{2+}$  transport in basolateral membranes from gills of freshwater- and seawater- adapted tilapia. *J. exp. Biol.* **186**, 95–108.
